# Supplementary material
Source: Springer Nature journal article supplement (https://www.springermedizin.de/resource/supplementary/12963_2009_90_MOESM1_ESM.pdf/9572672)

Self-reported non-smoker (n=60)

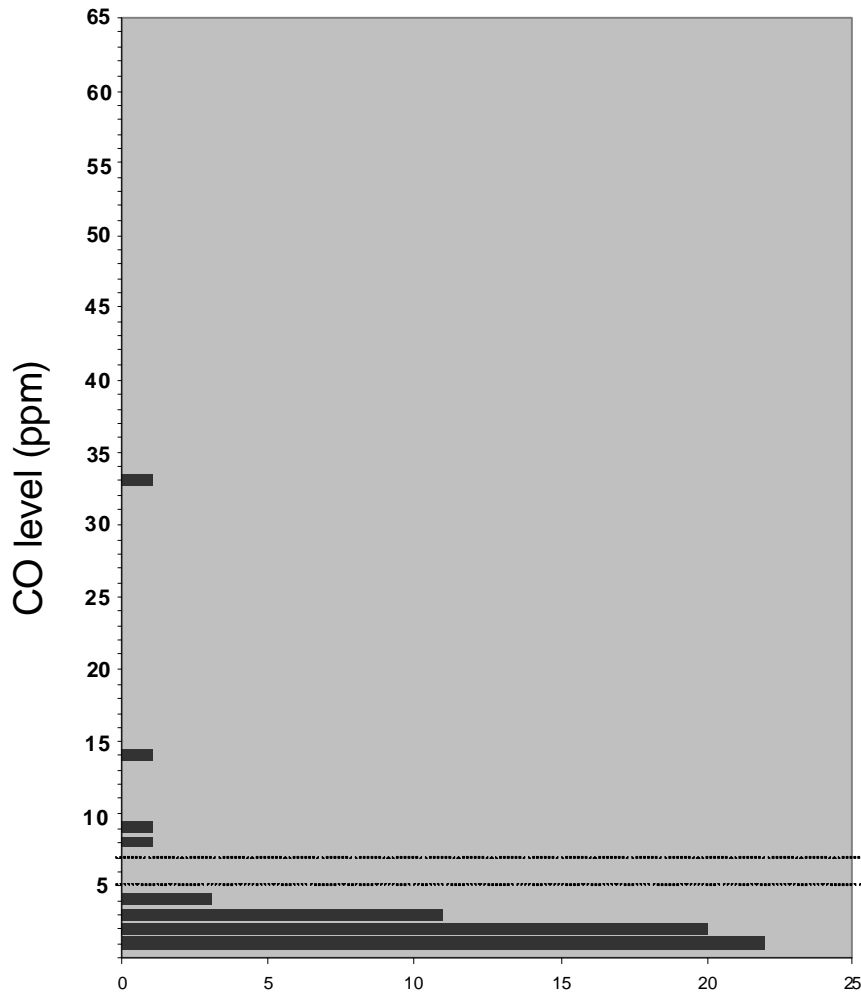

Self-reported smoker (n=249)

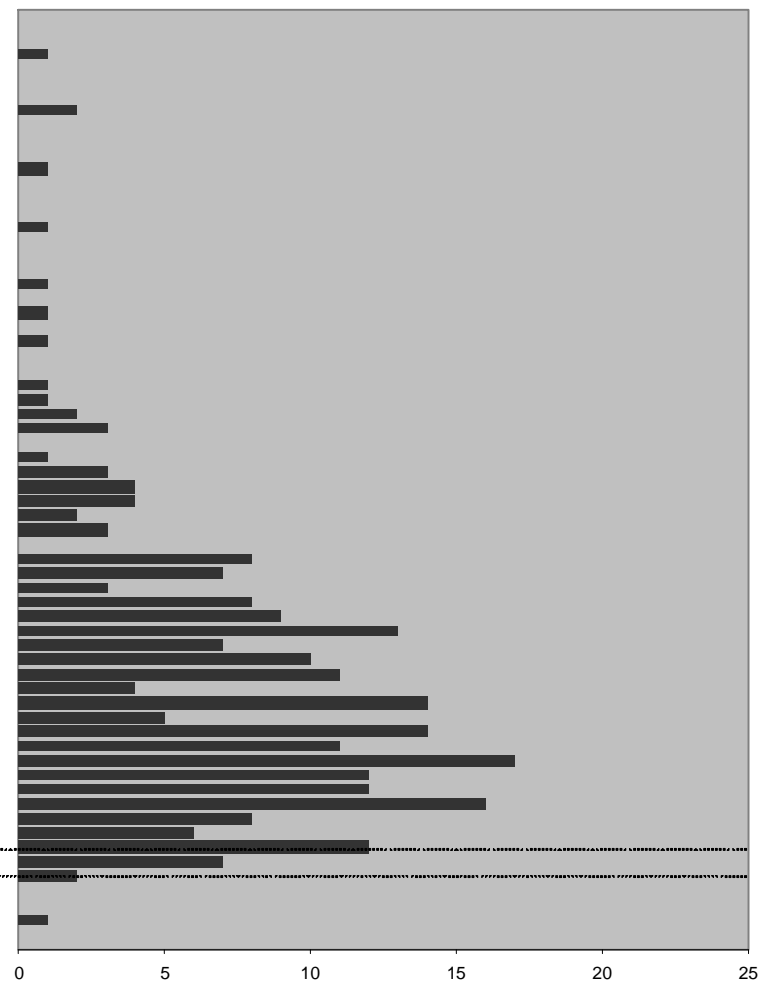

Frequency (number of participants)

Supplement: MOESM1 [file 9572672]
